# Supplementary material for: Non-invasive diagnosis of acute kidney injury using Mn-doped carbon dots-based magnetic resonance imaging
Source: Royal Society of Chemistry journal article supplement (doi:10.1039/d2bm02134j), 2023-01-01
Supplement: d2bm02134j1.pdf [file d2bm02134j1.pdf]

## Supplementary Information

### Non-invasive diagnosis of acute kidney injury using Mn-doped carbon dots-based magnetic resonance imaging

Xingtai Huang,<sup>†a</sup> Zihan Wang,<sup>†a</sup> Shujie Li,<sup>†b</sup> Shiqi Lin,<sup>a</sup> Lirong Zhang,<sup>c</sup> Zhaowei  
Meng,<sup>b</sup> Xuejun Zhang,<sup>a</sup> and Shao-Kai Sun<sup>\*a</sup>

<sup>a</sup> School of Medical Imaging, Tianjin Medical University, Tianjin 300203, China

<sup>b</sup> Department of Nuclear Medicine, Tianjin Medical University General Hospital,  
Tianjin 300052, China

<sup>c</sup> School of Basic Medical Sciences, Tianjin Institute of Urology, The Second Hospital  
of Tianjin Medical University, Tianjin Medical University, Tianjin 300203, China

#### Corresponding Author

\*Email: shaokaisun@tmu.edu.cn

#### Table of Content

Supplementary Figures (Fig. S1-S10)

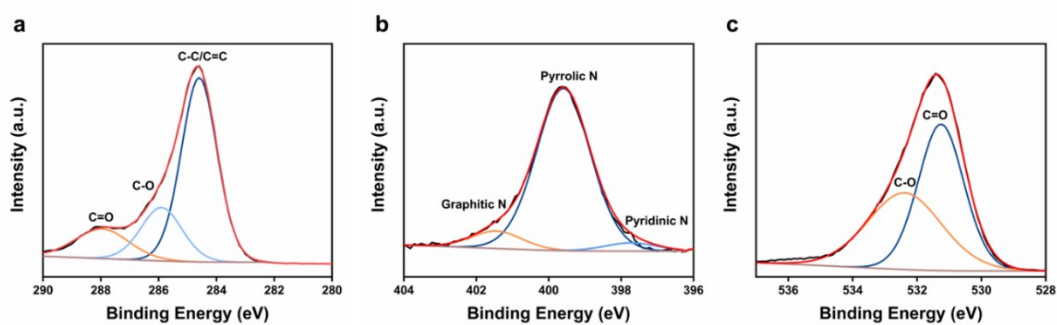

**Fig. S1** The high resolution XPS spectra of (a) C 1s, (b) N 1s, (c) O 1s

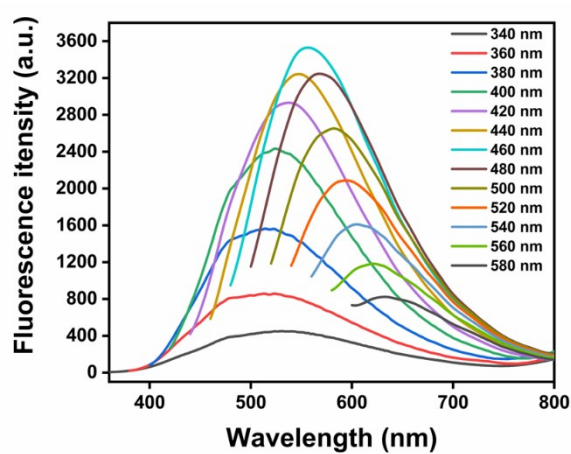

**Fig. S2** Fluorescence spectrum of Mn-CDs under different excitation wavelengths (340-580 nm).

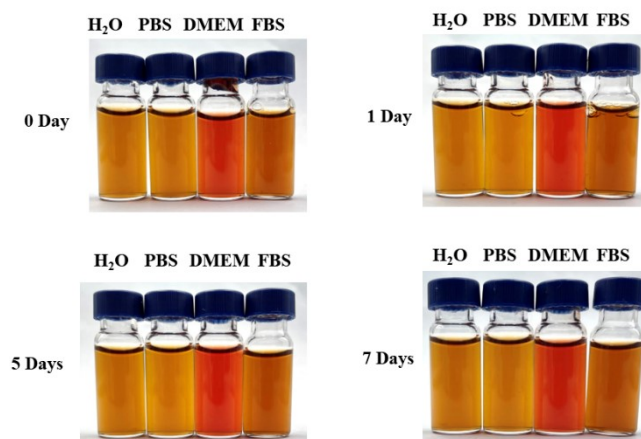

**Fig. S3** The photos of Mn-CDs dissolved in different medias including H<sub>2</sub>O, PBS (pH 7.4), DMEM, and FBS.

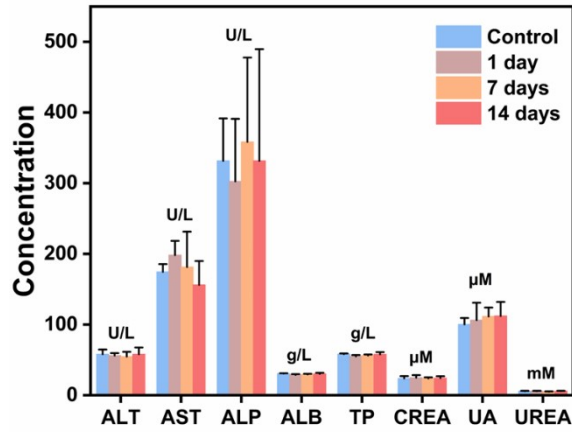

**Fig. S4** The blood biochemical indicators related to liver and kidney function after intravenous injection of Mn-CDs (16 mg/kg, n=5) at 1 day, 7 days, and 14 days.

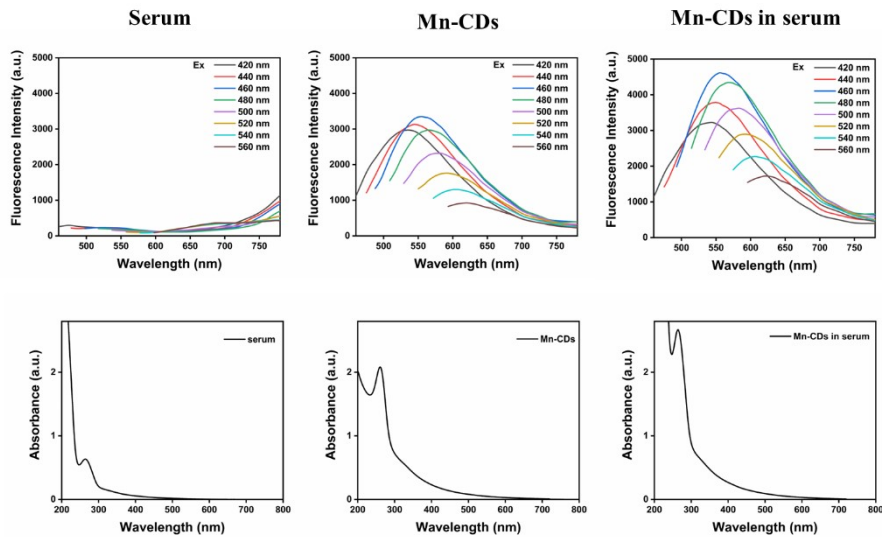

**Fig. S5** The fluorescence and UV-vis absorption spectra of serum, Mn-CDs and Mn-CDs incubated with serum.

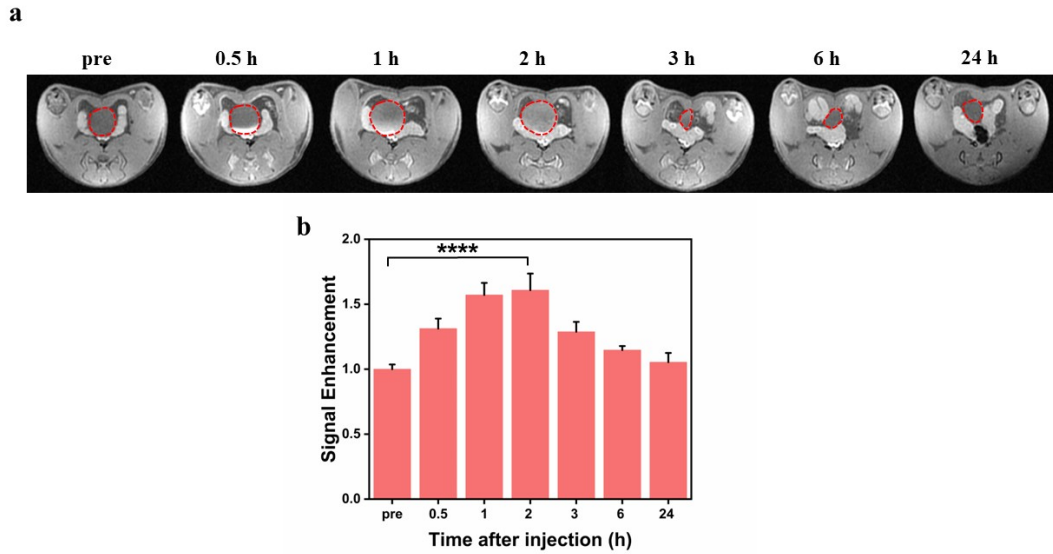

**Fig. S6** (a) The MR images of bladder at different time points after injection of Mn-CDs (16 mg/kg) in normal rat. The bladder was indicated by the red dotted cycle. (b) The relative changes of bladder MR signal at each time point after injection (n=3).

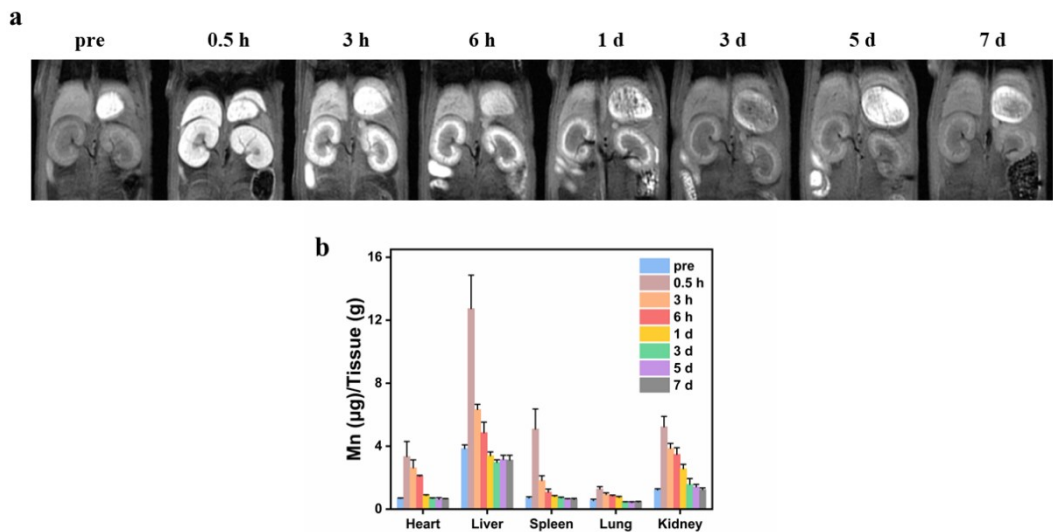

**Fig. S7** (a) The abnormal MR images of normal rats at different time points after injection of Mn-CDs (16 mg/kg). (b) The contents of Mn in different organs at different time points after injection of Mn-CDs (16 mg/kg, n=3).

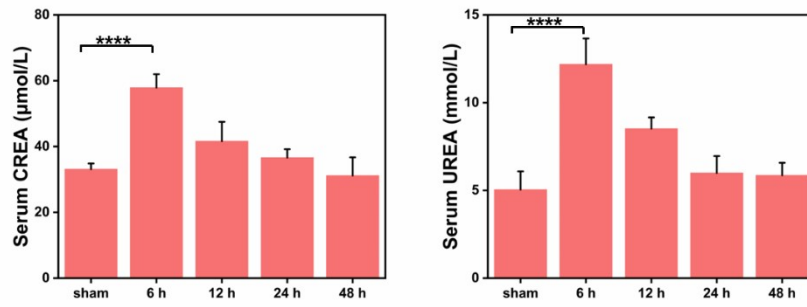

**Fig. S8** Concentrations of creatinine (CREA) and urea (UREA) in serum after different perfusion times (6 h, 12 h, 24 h, and 48 h) since left renal pedicle was clamped for 1 h (n=5).

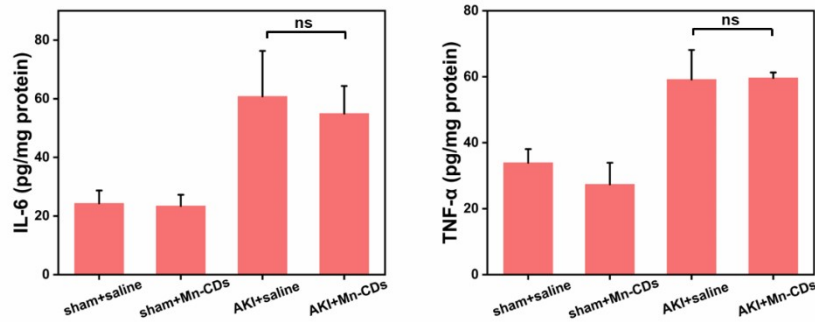

**Fig. S9** The levels of inflammatory cytokines (IL-6 and TNF-α) in the left kidney of AKI rats and sham-operated rats after injection of saline or Mn-CDs (16 mg/kg, n=3).

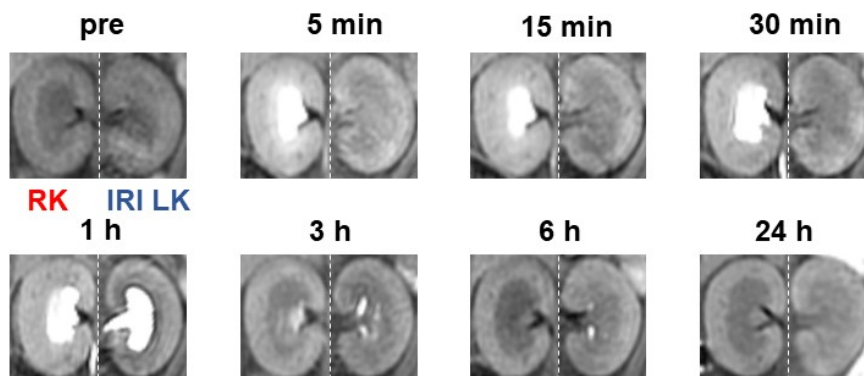

**Fig. S10** MR images of kidneys in rat with IRI at different time points after intravenous injection of Gd-DTPA (0.03 mmol/kg, n=3).

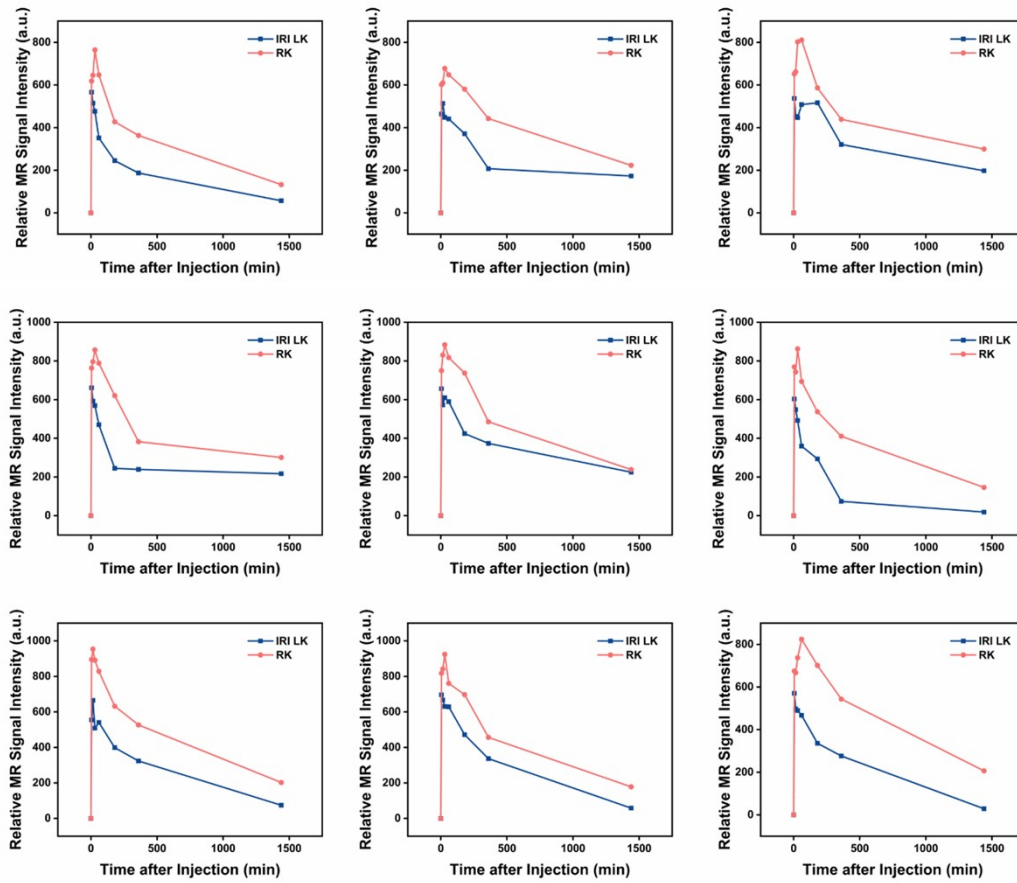

**Fig. S11** Relative MR signal intensity curve of LK and RK in each rat with IRI after intravenous injection of Mn-CDs (n=10, including one in Fig. 3d).

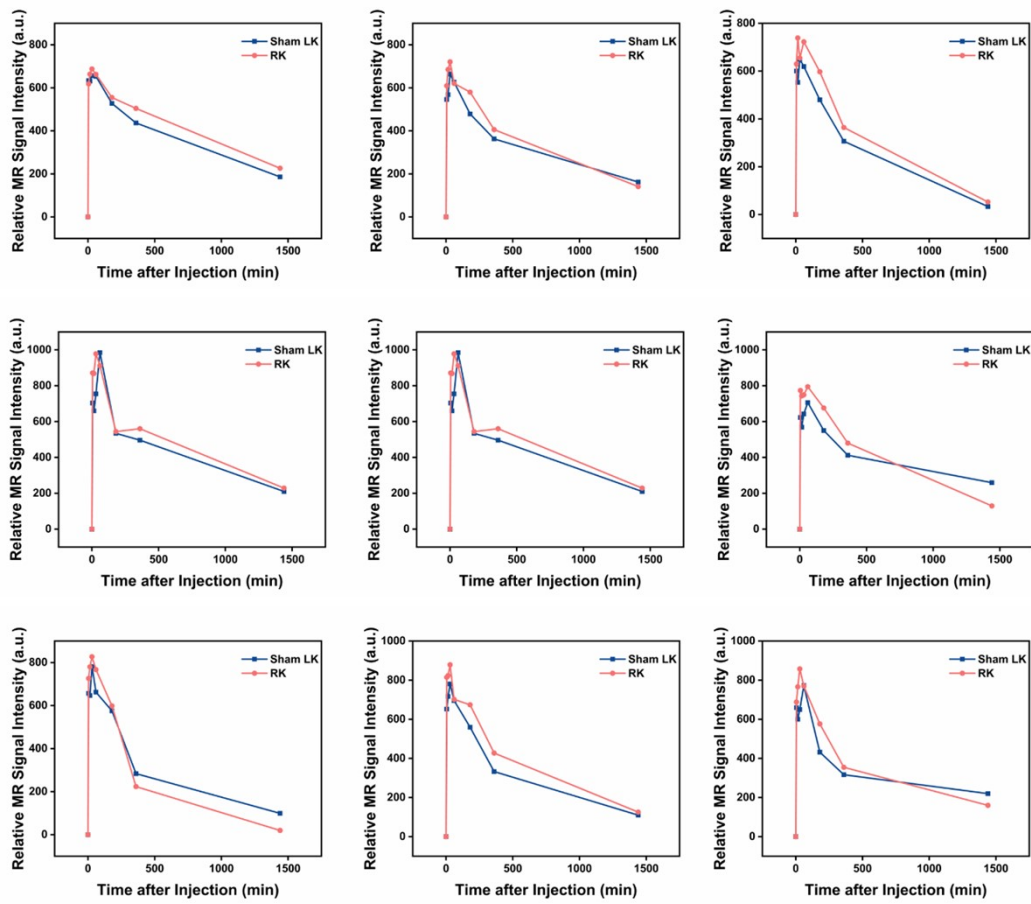

**Fig. S12** Relative MR signal intensity curve of LK and RK in each rat with sham operation after intravenous injection of Mn-CDs (n=10, including one in Fig. 3e).
